# Supplementary material for: Colloidal synthesis and thermoelectric properties of La-doped SrTiO3 nanoparticles
Source: Royal Society of Chemistry journal article supplement (doi:10.1039/c3ta14699e), 2014-01-01
Supplement: c3ta14699e.pdf [file c3ta14699e.pdf]

## Supplementary Information

### Colloidal Synthesis and Thermoelectric Properties of La-doped SrTiO<sub>3</sub> Nanoparticles

Kunsu Park<sup>a,b</sup>, Jae Sung Son<sup>a,b</sup>, Sung Ill Woo<sup>c</sup>, Kwangsoo Shin<sup>a,b</sup>, Min-Wook Oh<sup>c</sup>, Su-Dong Park<sup>c</sup>, and Taeghwan Hyeon<sup>\*a,b</sup>

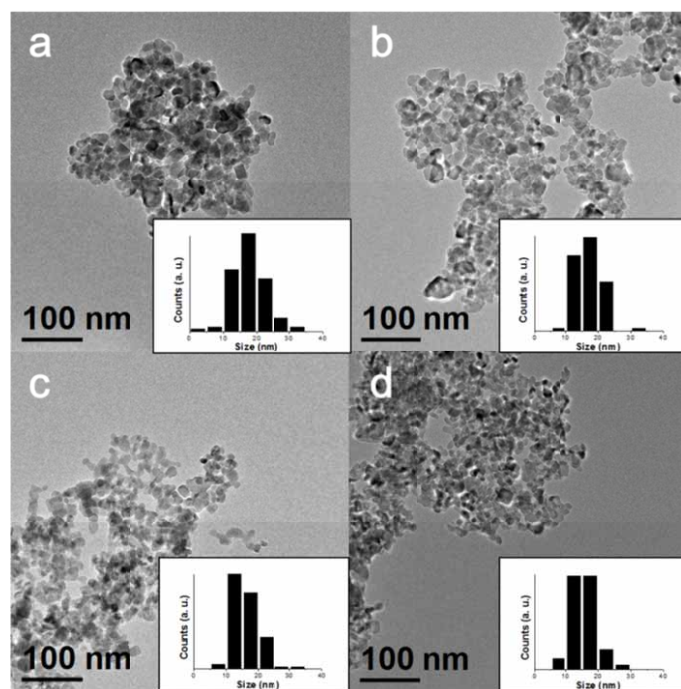

**Figure S1.** TEM images of synthesized SrTiO<sub>3</sub> doped with (a) 3.1%, (b) 4.7%, (c) 7.7%, and (d) 9.0% La. Insets show the size distribution histograms which were collected by measuring the sizes of randomly selected 200 particles.

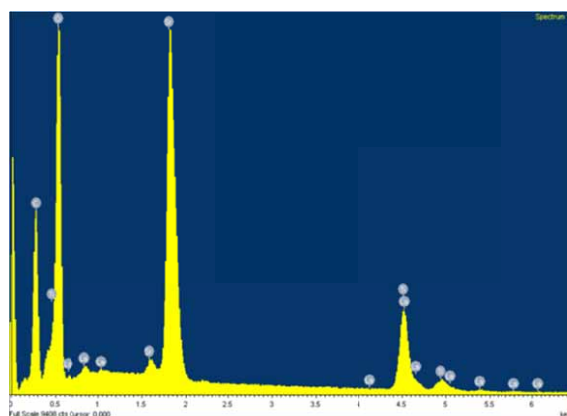

**Figure S2.** Energy-dispersive X-ray spectroscopy (EDX) of 9.0% La-doped SrTiO<sub>3</sub> nanoparticles.

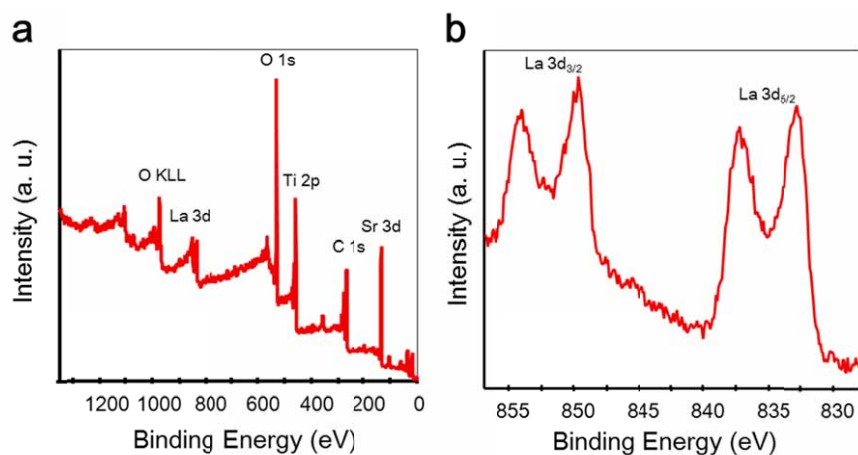

**Figure S3.** X-ray photoelectron spectroscopy (XPS) of 9.0% La-doped SrTiO<sub>3</sub> nanoparticles.

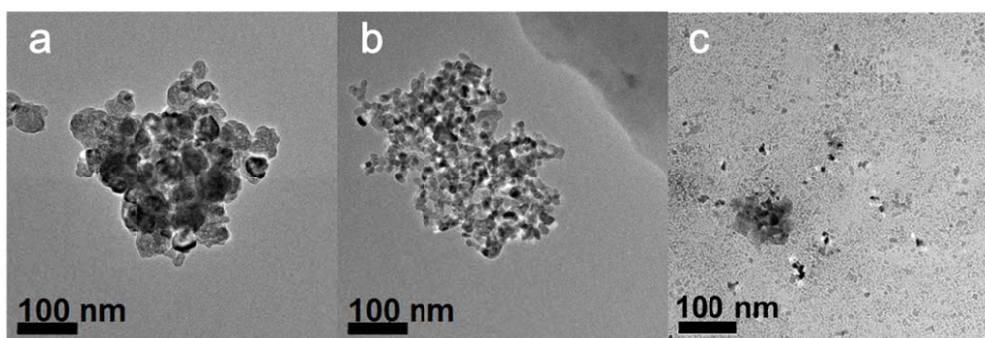

**Figure S4.** TEM images of 3.1% La-doped SrTiO<sub>3</sub> synthesized with (a) no oleic acid, (b) 20 mmol of oleic acid, and (c) 0.6M TMAH.

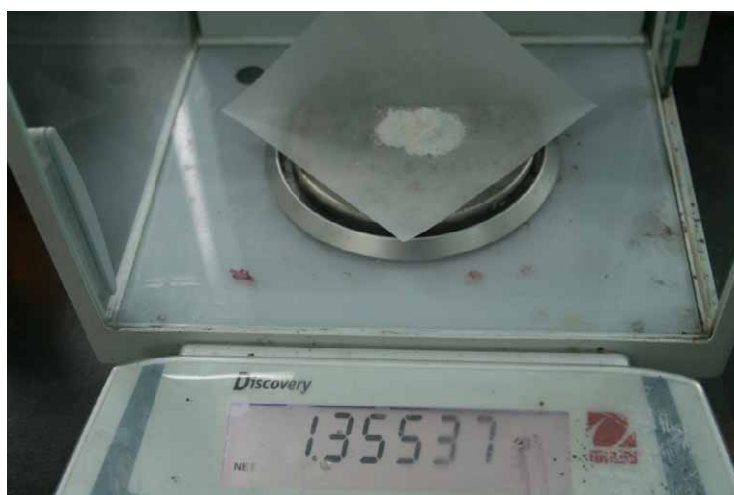

**Figure S5.** A photograph showing 1.35g of La-doped SrTiO<sub>3</sub> nanoparticles treated surfactant-removal process.

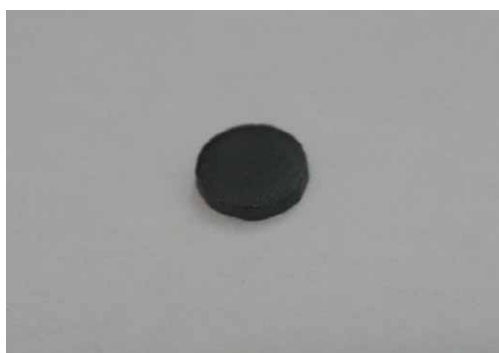

**Figure S6.** A photograph showing La-doped SrTiO<sub>3</sub> nanostructured bulk pellet (9.0% La) prepared by SPS.

**Table S1.** Sintering temperature dependent density and grain size of nanostructured bulk La-doped SrTiO<sub>3</sub>. <sup>a</sup> The relative density (%T.D.) are shown on the table.

| Temperature (°C) | Density (g/cm <sup>3</sup> ) | Grain size (nm) |
|------------------|------------------------------|-----------------|
| 400              | 2 (38%) <sup>a</sup>         | 16              |
| 600              | 2 (38%)                      | 16              |
| 800              | 2.3 (45%)                    | 20              |
| 1000             | 4.3 (83%)                    | 26              |
| 1200             | 4.6 (88%)                    | 34              |
| 1300             | 4.7 (90%)                    | 50              |
| 1400             | 4.8 (92%)                    | 69              |
